# Supplementary material for: Control of crystal structures of fluorescent two-component supramolecular systems by varying substituents and their positions
Source: Royal Society of Chemistry journal article supplement (doi:10.1039/c3ce42128g), 2013-12-11

## ELECTRONIC SUPPLEMENTARY INFORMATION

### **Control of crystal structures of fluorescent two-component supramolecular systems by varying substituents and their positions**

Yuki Tanaka,<sup>a</sup> Hideyuki Tabata,<sup>b</sup> Nobuo Tajima,<sup>c</sup> Reiko Kuroda,<sup>b</sup> and Yoshitane Imai<sup>\*a</sup>

<sup>a</sup> Department of Applied Chemistry, Faculty of Science and Engineering, Kinki University, 3-4-1 Kowakae, Higashi-Osaka, Osaka 577-8502, Japan.

<sup>b</sup> Research Institute for Science and Technology, Tokyo University of Science, 2641 Yamazaki, Noda-shi, Chiba, 278-8510, Japan.

<sup>c</sup> First-Principles Simulation Group, Computational Materials Science Center, NIMS, Sengen, Tsukuba, Ibaraki 305-0047, Japan.

\*Corresponding author. (Y.I.) Tel.: +81 06 6730 5880x5241; fax: +81 06 6727 2024;  
e-mail: [y-imai@apch.kindai.ac.jp](mailto:y-imai@apch.kindai.ac.jp).

**Table ESI-1.** Crystallographic data for complexes I-VI

|                                           | I                                                                                                                                        | II                                                                                                                                        | III                                                                              |
|-------------------------------------------|------------------------------------------------------------------------------------------------------------------------------------------|-------------------------------------------------------------------------------------------------------------------------------------------|----------------------------------------------------------------------------------|
| Empirical formula                         | C <sub>11</sub> H <sub>8</sub> O <sub>2</sub> ·C <sub>7</sub> H <sub>8</sub> ClN                                                         | C <sub>11</sub> H <sub>8</sub> O <sub>2</sub> ·C <sub>7</sub> H <sub>8</sub> ClN                                                          | C <sub>11</sub> H <sub>8</sub> O <sub>2</sub> ·C <sub>7</sub> H <sub>8</sub> BrN |
| Formula weight                            | 313.77                                                                                                                                   | 313.77                                                                                                                                    | 358.23                                                                           |
| Crystal system                            | monoclinic                                                                                                                               | orthorhombic                                                                                                                              | triclinic                                                                        |
| Space group                               | <i>C2/c</i>                                                                                                                              | <i>Pbca</i>                                                                                                                               | <i>P</i> $\bar{1}$                                                               |
| Symmetry codes                            | <i>x, y, z; -x, y, -z+1/2; x+1/2, y+1/2, z; -x+1/2, y+1/2, -z+1/2; -x, -y, -z; x, -y, z-1/2; -x+1/2, y+1/2, -z; x+1/2, -y+1/2, z-1/2</i> | <i>x, y, z; -x+1/2, -y, z+1/2; -x, y+1/2, -z+1/2; x+1/2, -y+1/2, -z; -x, -y, -z; x-1/2, y, -z-1/2; x, -y-1/2, z-1/2; -x-1/2, y-1/2, z</i> | <i>x, y, z; -x, -y, -z</i>                                                       |
| <i>a</i> / Å                              | 18.671(2)                                                                                                                                | 10.5204(7)                                                                                                                                | 4.6370(18)                                                                       |
| <i>b</i> / Å                              | 6.0403(6)                                                                                                                                | 8.7184(6)                                                                                                                                 | 11.658(4)                                                                        |
| <i>c</i> / Å                              | 29.098(3)                                                                                                                                | 33.531(2)                                                                                                                                 | 15.392(5)                                                                        |
| <i>α</i> / deg                            | 90.00                                                                                                                                    | 90.00                                                                                                                                     | 67.925(12)                                                                       |
| <i>β</i> / deg                            | 106.031(4)                                                                                                                               | 90.00                                                                                                                                     | 82.161(15)                                                                       |
| <i>γ</i> / deg                            | 90.00                                                                                                                                    | 90.00                                                                                                                                     | 85.996(18)                                                                       |
| <i>Z</i>                                  | 8                                                                                                                                        | 8                                                                                                                                         | 2                                                                                |
| <i>D<sub>c</sub></i> / g cm <sup>-3</sup> | 1.322                                                                                                                                    | 1.355                                                                                                                                     | 1.558                                                                            |
| <i>V</i> / Å <sup>3</sup>                 | 3154.0(6)                                                                                                                                | 3075.5(3)                                                                                                                                 | 763.7(5)                                                                         |
| <i>μ</i> (Mo Kα) / mm <sup>-1</sup>       | 0.248                                                                                                                                    | 0.255                                                                                                                                     | 2.698                                                                            |
| No. of reflections                        |                                                                                                                                          |                                                                                                                                           |                                                                                  |
| measured                                  | 8452                                                                                                                                     | 17697                                                                                                                                     | 5471                                                                             |
| unique                                    | 3107                                                                                                                                     | 3610                                                                                                                                      | 3268                                                                             |
| <i>I</i> > 2.0σ( <i>I</i> )               | 2667                                                                                                                                     | 2827                                                                                                                                      | 2811                                                                             |
| <i>R</i> ( <i>I</i> > 2.0σ( <i>I</i> ))   | 0.0442                                                                                                                                   | 0.0498                                                                                                                                    | 0.0645                                                                           |
| <i>R</i> (all data)                       | 0.0511                                                                                                                                   | 0.0647                                                                                                                                    | 0.0757                                                                           |
| <i>T</i> / K                              | 93(2)                                                                                                                                    | 93(2)                                                                                                                                     | 100(2)                                                                           |
| CCDC code                                 | 965542                                                                                                                                   | 965543                                                                                                                                    | 965544                                                                           |

|                                           | IV                                                                                                                                   | V                                                                                                                                   | VI                                                                              |
|-------------------------------------------|--------------------------------------------------------------------------------------------------------------------------------------|-------------------------------------------------------------------------------------------------------------------------------------|---------------------------------------------------------------------------------|
| Empirical formula                         | C <sub>11</sub> H <sub>8</sub> O <sub>2</sub> ·C <sub>7</sub> H <sub>8</sub> BrN                                                     | C <sub>11</sub> H <sub>8</sub> O <sub>2</sub> ·C <sub>8</sub> H <sub>11</sub> N                                                     | C <sub>11</sub> H <sub>8</sub> O <sub>2</sub> ·C <sub>8</sub> H <sub>11</sub> N |
| Formula weight                            | 358.23                                                                                                                               | 293.35                                                                                                                              | 293.35                                                                          |
| Crystal system                            | orthorhombic                                                                                                                         | monoclinic                                                                                                                          | monoclinic                                                                      |
| Space group                               | <i>Pbca</i>                                                                                                                          | <i>C2/c</i>                                                                                                                         | <i>P2<sub>1</sub>/c</i>                                                         |
| Symmetry codes                            | $x, y, z; -x+1/2, -y, z+1/2; -x, y+1/2, -z+1/2; x+1/2, -y+1/2, -z; -x, -y, -z; x-1/2, y, -z-1/2; x, -y-1/2, z-1/2; -x-1/2, y-1/2, z$ | $x, y, z; -x, y, -z+1/2; x+1/2, y+1/2, z; -x+1/2, y+1/2, -z+1/2; -x, -y, -z; x, -y, z-1/2; -x+1/2, y+1/2, -z; x+1/2, -y+1/2, z-1/2$ | $x, y, z; -x, y+1/2, -z+1/2; -x, -y, -z; x, -y-1/2, z-1/2$                      |
| <i>a</i> / Å                              | 10.6279(9)                                                                                                                           | 18.404(5)                                                                                                                           | 15.604(4)                                                                       |
| <i>b</i> / Å                              | 8.7139(7)                                                                                                                            | 6.0250(15)                                                                                                                          | 6.2630(14)                                                                      |
| <i>c</i> / Å                              | 33.989(3)                                                                                                                            | 28.832(8)                                                                                                                           | 15.601(4)                                                                       |
| <i>α</i> / deg                            | 90.00                                                                                                                                | 90.00                                                                                                                               | 90.00                                                                           |
| <i>β</i> / deg                            | 90.00                                                                                                                                | 104.628(3)                                                                                                                          | 90.680(3)                                                                       |
| <i>γ</i> / deg                            | 90.00                                                                                                                                | 90.00                                                                                                                               | 90.00                                                                           |
| <i>Z</i>                                  | 8                                                                                                                                    | 8                                                                                                                                   | 4                                                                               |
| <i>D<sub>c</sub></i> / g cm <sup>-3</sup> | 1.512                                                                                                                                | 1.260                                                                                                                               | 1.278                                                                           |
| <i>V</i> / Å <sup>3</sup>                 | 3147.7(4)                                                                                                                            | 3093.4(14)                                                                                                                          | 1524.5(6)                                                                       |
| <i>μ</i> (Mo Kα) / mm <sup>-1</sup>       | 2.618                                                                                                                                | 0.081                                                                                                                               | 0.083                                                                           |
| No. of reflections                        |                                                                                                                                      |                                                                                                                                     |                                                                                 |
| measured                                  | 17795                                                                                                                                | 7027                                                                                                                                | 11871                                                                           |
| unique                                    | 3586                                                                                                                                 | 3124                                                                                                                                | 4208                                                                            |
| <i>I</i> > 2.0σ( <i>I</i> )               | 2312                                                                                                                                 | 1631                                                                                                                                | 3501                                                                            |
| <i>R</i> ( <i>I</i> > 2.0σ( <i>I</i> ))   | 0.0524                                                                                                                               | 0.0537                                                                                                                              | 0.0433                                                                          |
| <i>R</i> (all data)                       | 0.0913                                                                                                                               | 0.1177                                                                                                                              | 0.0526                                                                          |
| <i>T</i> / K                              | 100(2)                                                                                                                               | 100(2)                                                                                                                              | 100(2)                                                                          |
| CCDC code                                 | 965545                                                                                                                               | 965546                                                                                                                              | 965547                                                                          |

**Table ESI-2. Interaction of complex I.**

|          | Distance (Å) | Interaction                               | Gamma* (Deg) |
|----------|--------------|-------------------------------------------|--------------|
| <i>A</i> | 3.417(2)     | C(8)-H... $\pi$ (C4-C5-C6-C7-C8-C9)       | 6.33         |
| <i>B</i> | 3.760(2)     | C(3)-H... $\pi$ (C12-C13-C14-C15-C16-C17) | 13.88        |
| <i>C</i> | 3.454(2)     | C(14)-H... $\pi$ (C1-C2-C3-C4-C9-C10)     | 9.48         |
| <i>D</i> | 3.585(3)     | C(15)-H... $\pi$ (C4-C5-C6-C7-C8-C9)      | 6.96         |
| <i>E</i> | 3.4214(10)   | Cl(1)...Cl(1)                             |              |

\*Angle C-H vector and normal to  $\pi$  plane

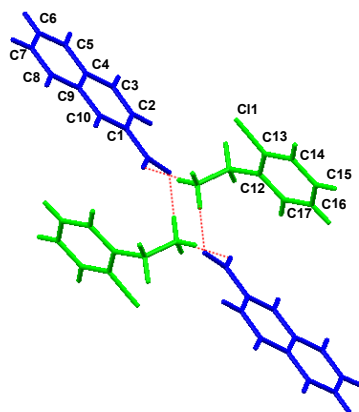

**Table ESI-3. Interaction of complex II.**

|          | Distance (Å) | Interaction                                | Gamma* (Deg) |
|----------|--------------|--------------------------------------------|--------------|
| <i>A</i> | 3.576(2)     | C(8)-H... $\pi$ (C1-C2-C3-C4-C9-C10)       | 8.41         |
| <i>B</i> | 3.5949(18)   | C(18)-H... $\pi$ (C12-C13-C14-C15-C16-C17) | 7.09         |
| <i>C</i> | 3.5857(13)   | Cl(1)... $\pi$ (C4-C5-C6-C7-C8-C9)         | 7.11         |

\*Angle C-H (or Cl) vector and normal to  $\pi$  plane

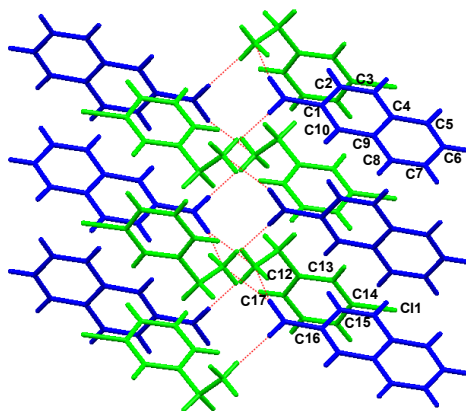

**Table ESI-4.** Interaction of complex **III**.

|          | Distance (Å) | Interaction                                | Gamma* (Deg) |
|----------|--------------|--------------------------------------------|--------------|
| <i>A</i> | 3.373(6)     | C(27)-H... $\pi$ (C21-C22-C23-C24-C25-C26) | 1.74         |

\*Angle C-H vector and normal to  $\pi$  plane

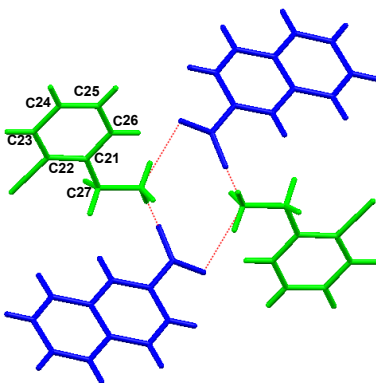

**Table ESI-5.** Interaction of complex **IV**.

|          | Distance (Å) | Interaction                                | Gamma* (Deg) |
|----------|--------------|--------------------------------------------|--------------|
| <i>A</i> | 3.570(4)     | C(8)-H... $\pi$ (C1-C2-C3-C4-C9-C10)       | 7.92         |
| <i>B</i> | 3.568(3)     | C(18)-H... $\pi$ (C12-C13-C14-C15-C16-C17) | 4.41         |
| <i>C</i> | 3.6807 (19)  | Br(1)... $\pi$ (C5-C6-C7-C8-C10-C9)        | 6.81         |

\*Angle C-H (or Br) vector and normal to  $\pi$  plane

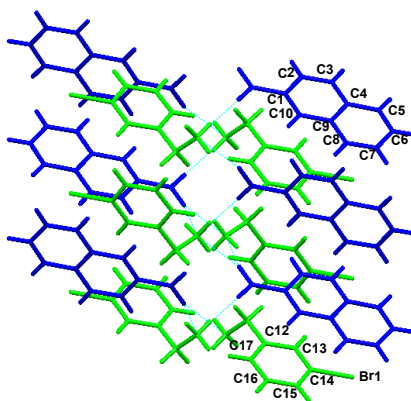

**Table ESI-6.** Interaction of complex V.

|          | Distance (Å) | Interaction                               | Gamma* (Deg) |
|----------|--------------|-------------------------------------------|--------------|
| <i>A</i> | 3.370(3)     | C(8)-H... $\pi$ (C5-C6-C7-C8-C9-C10)      | 6.34         |
| <i>B</i> | 3.732(3)     | C(4)-H... $\pi$ (C21-C22-C23-C24-C25-C26) | 17.70        |
| <i>C</i> | 3.424(3)     | C(23)-H... $\pi$ (C1-C2-C3-C4-C5-C6)      | 9.18         |

\*Angle C-H vector and normal to  $\pi$  plane

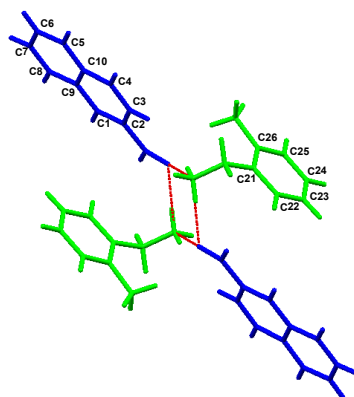

**Table ESI-7.** Interaction of complex VI.

|          | Distance (Å) | Interaction                                | Gamma* (Deg) |
|----------|--------------|--------------------------------------------|--------------|
| <i>A</i> | 3.6113(15)   | C(3)-H... $\pi$ (C5-C6-C7-C8-C9-C10)       | 16.90        |
| <i>B</i> | 3.7427(16)   | C(28)-H... $\pi$ (C1-C2-C3-C4-C10-C9)      | 6.60         |
| <i>C</i> | 3.3959(15)   | C(8)-H... $\pi$ (C21-C22-C23-C24-C25-C26)  | 1.80         |
| <i>D</i> | 3.4249(15)   | C(27)-H... $\pi$ (C21-C22-C23-C24-C25-C26) | 13.28        |

\*Angle C-H vector and normal to  $\pi$  plane

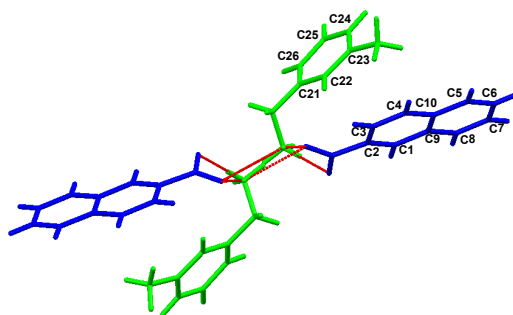

Supplement: c3ce42128g.pdf [file c3ce42128g.pdf]
